# Supplementary material for: Automated 3D-Volumetric Index of Skeletal Muscle Predicts Survival in Severe Aplastic Anemia Patients after Hematopoietic Stem Cell Transplantation
Source: Research Square preprint supplement (doi:10.21203/rs.3.rs-7663194/v1), 2025-10-10
Supplement: Supplementary file 1 [file 734a67b6d696604f3f0790d9.docx]

**Table 1 Baseline characteristics of SAA patients.**

| **Characteristics** | **Overall**  **(n=184)** | **Female**  **(n=72)** | **Male**  **(n=112)** | ***P* value** | |
| --- | --- | --- | --- | --- | --- |
| **Clinical characteristics** | | | | |
| Age (years) | 29.0 (23.3-37.0) | 29.5 (24.0-38.0) | 29.0 (23.0-36.8) | 0.523 |
| BMI (kg/m2) | 20.8 (19.1-22.8) | 20.5 (18.8-21.9) | 21.4 (19.3-23.2) | **0.040** |
| Diagnosis |  |  |  | 0.432 |
| SAA | 140 (76.1%) | 57 (40.7%) | 83 (59.3%) |  |
| VSAA | 44 (23.9%) | 15 (34.1%) | 29 (65.9%) |  |
| Donor type |  |  |  | 0.667 |
| MSD | 55 (29.9%) | 24 (43.6%) | 31 (56.4%) |  |
| MUD | 51 (27.7%) | 20 (39.2%) | 31 (60.8%) |  |
| HID | 78 (42.4%) | 28 (35.9%) | 50 (64.1%) |  |
| Conditioning regimen |  |  |  | 0.658 |
| CTX+BU+ATG | 78 (42.4%) | 29 (37.2%) | 49 (62.8%) |  |
| FLU+CTX+ATG | 38 (20.7%) | 16 (42.1%) | 22 (57.9%) |  |
| TBI+CTX+ATG +FLU | 59 (32.1%) | 25 (42.4%) | 34 (57.6%) |  |
| Others | 9 (4.9%) | 2 (22.2%) | 7 (77.8%) |  |
| Stem cell source |  |  |  | 0.988 |
| PB | 51 (27.7%) | 20 (39.2%) | 31 (60.8%) |  |
| PB+BM | 133 (72.3%) | 52 (39.1%) | 81 (60.9%) |  |
| Follow up time(months) | 25.6 (12.1-45.3) | 24.1 (11.9-44.4) | 28.0 (12.1-47.0) | 0.748 |
| All-cause death | 30 (16.3%) | 12 (40.0%) | 18 (60.0%) | 0.915 |
| **Radiographic characteristics** | | | | |
| 2D parameters from the section above aortic arch of chest CT | | | | |
| SMA, cm2 | 20.4 (16.9-25.7) | 16.6 (13.9-18.1) | 24.5 (21.0-28.2) | **<0.001** |
| SMI, cm2/m2 | 7.6 (6.4-9.2) | 6.6 (5.4-7.2) | 8.7 (7.3-10.0) | **<0.001** |
| SMD, HU | 43.0 (35.5-52.4) | 37.5 (32.5-43.4) | 48.0 (40.0-55.5) | **<0.001** |
| SFA, cm2 | 9.9 (5.2-14.2) | 12.0 (8.4-16.1) | 8.1 (3.6-12.1) | **<0.001** |
| SFI, cm2/m2 | 3.6 (1.9-5.3) | 4.8 (3.3-6.4) | 2.9 (1.3-4.2) | **<0.001** |
| 3D parameters from T1-12 of chest CT | | | | |
| SMV, cm3 | 3171.1 (2601.8-3894.7) | 2472.4 (2136.3-2818.3) | 3598.1 (3220.9-4205.8) | **<0.001** |
| SMVI, cm3/m2 | 1151.8 (990.9-1356.1) | 996.0 (860.4-1103.0) | 1291.1 (1135.7-1449.9) | **<0.001** |
| SMM, g | 3361.3 (2757.9-4128.4) | 2620.8 (2264.5-2987.4) | 3810.8 (3414.2-4458.2) | **<0.001** |
| SFV, cm3 | 1701.7 (999.5-2476.3) | 1990.3 (1291.5-2711.0) | 1452.9 (673.9-2211.7) | **0.001** |
| SFVI, cm3/m2 | 613.6 (366.3-928.9) | 779.0 (520.0-1089.0) | 509.5 (241.3-837.7) | **<0.001** |

Abbreviations: 2D, two-dimensional; 3D, three-dimensional; Alb, albumin; ATG, antithymocyte immunoglobulin; BM, bone marrow; BMI, body mass index; BU, busulfan; CY, cyclophosphamide; FLU, fludarabine; HID, haploidentical donor; HU, Hounsfield unit; MSD, matched sibling donor; MUD, matched unrelated donor; PB, peripheral blood; SAA, severe aplastic anemia; SFA, subcutaneous fat area; SFI, subcutaneous fat area index; SFV, subcutaneous fat volume; SFVI, subcutaneous fat volume index; SMA, skeletal muscle area; SMD, skeletal muscle density; SMI, skeletal muscle area index; SMM, skeletal muscle mass; SMV, skeletal muscle volume; SMVI, skeletal muscle volume index; TBI, total body irradiation; TP, total protein; VSAA, very severe aplastic anemia. The bold values were statistically significant.
