# Supplementary material for: Automated 3D-Volumetric Index of Skeletal Muscle Predicts Survival in Severe Aplastic Anemia Patients after Hematopoietic Stem Cell Transplantation
Source: Research Square preprint supplement (doi:10.21203/rs.3.rs-7663194/v1), 2025-10-10
Supplement: Supplementary file 6 [file Supplementary figure legends.docx]

**Figure S1. Kaplan‒Meier survival estimates for overall survival (OS) and failure-free survival (FFS) according to SF volume and mass in the whole chest (T1–T12 level).**

Abbreviations: SF, subcutaneous fat; SFA, subcutaneous fat area; SFI, subcutaneous fat area index; SFV, subcutaneous fat volume; SFVI, subcutaneous fat volume index.

**Figure S2. Time-dependent receiver operating characteristic (ROC) curves for the 3D and 2D models in predicting 1-, 3-, and 5-year overall survival (OS).**

Abbreviations: 3D, three-dimensional; 2D, two-dimensional.
